1 **TITLE: Development and worldwide use of a non-lethal and minimal population-level**  
2 **impact protocols for the isolation of chytrids from amphibians**

3 **AUTHORS:** Matthew C. Fisher<sup>1\*</sup>, Pria Ghosh<sup>1</sup>, Jennifer M. G. Shelton<sup>1</sup>, Kieran Bates<sup>1</sup>, Lola  
4 Brookes<sup>10</sup>, Claudia Wierzbicki<sup>1</sup>, Gonçalo M. Rosa<sup>10,39</sup>, Rhys A. Farrer<sup>1</sup>, David M.  
5 Aanensen<sup>1,42</sup>, Mario Alvarado-Rybak<sup>2</sup>, Arnaud Bataille<sup>3,4</sup>, Lee Berger<sup>5</sup>, Susanne Böll<sup>6</sup>, Jaime  
6 Bosch<sup>7</sup>, France C. Clare<sup>1</sup>, Elodie Courtois<sup>8</sup>, Angelica Crottini<sup>9</sup>, Andrew A. Cunningham<sup>10</sup>,  
7 Thomas M. Doherty-Bone<sup>11</sup>, Fikirte Gebresenbet<sup>12</sup>, David J. Gower<sup>13</sup>, Jacob Höglund<sup>14</sup>,  
8 Timothy Y. James<sup>36</sup>, Thomas S. Jenkinson<sup>36</sup>, Tiffany A. Kosch<sup>3,5</sup>, Carolina Lambertini<sup>37</sup>,  
9 Anssi Laurila<sup>14</sup>, Chun-Fu Lin<sup>15</sup>, Adeline Loyau<sup>16,17</sup>, An Martel<sup>18</sup>, Sara Meurling<sup>14</sup>, Claude  
10 Miaud<sup>19</sup>, Pete Minting<sup>20</sup>, Serge Ndriantsoa<sup>21</sup>, Frank Pasmans<sup>18</sup>, Tsanta Rakotonanahary<sup>21</sup>,  
11 Falitiana C. E. Rabemananjara<sup>21,40</sup>, Luisa P. Ribeiro<sup>37</sup>, Dirk S. Schmeller<sup>16,17</sup>, Benedikt R.  
12 Schmidt<sup>22,41</sup>, Lee Skerratt<sup>5</sup>, Freya Smith<sup>23</sup>, Claudio Soto-Azat<sup>2</sup>, Giulia Tessa<sup>24</sup>, Luís Felipe  
13 Toledo<sup>37</sup>, Andrés Valenzuela-Sánchez<sup>2,32</sup>, Ruhan Verster<sup>33</sup>, Judit Vörös<sup>34</sup>, Bruce Waldman<sup>3</sup>,  
14 Rebecca J. Webb<sup>5</sup>, Che Weldon<sup>33</sup>, Emma Wombwell<sup>10</sup>, Kelly R. Zamudio<sup>38</sup>, Joyce E.  
15 Longcore<sup>35</sup>, Trenton W. J. Garner<sup>10</sup>

16

17 <sup>1</sup> Department of Infectious Disease Epidemiology, School of Public Health, Faculty of  
18 Medicine (St Mary's campus), Imperial College London, London W2 1PG, UK

19 <sup>2</sup> Centro de Investigación para la Sustentabilidad, Facultad de Ecología y Recursos Naturales,  
20 Universidad Andres Bello, Republica 440, Santiago, Chile

21 <sup>3</sup> Laboratory of Behavioral and Population Ecology, School of Biological Sciences, Seoul  
22 National University, Seoul 08826, South Korea

23 <sup>4</sup> UMR ASTRE, CIRAD, Montpellier, France

24 <sup>5</sup> One Health Research Group, College of Public Health, Medical and Veterinary Sciences,  
25 James Cook University, Townsville, Queensland, 4811, Australia

26 <sup>6</sup> Agency for Population Ecology and Nature Conservancy, Gerbrunn, Germany

27 <sup>7</sup> Museo Nacional de Ciencias Naturales, CSIC c/ Jose Gutierrez Abascal 2, 28006 Madrid,  
28 Spain

29 <sup>8</sup> Laboratoire Ecologie, évolution, interactions des systèmes amazoniens (LEEISA),  
30 Université de Guyane, CNRS, IFREMER, 97300 Cayenne, French Guiana.

31 <sup>9</sup> CIBIO - Centro de Investigação em Biodiversidade e Recursos Genéticos, InBIO,  
32 Universidade do Porto, 4485-661 Vairão Portugal

- 33 <sup>10</sup> Institute of Zoology, Regent's Park, London, NW1 4RY, UK
- 34 <sup>11</sup> Conservation Programmes, Royal Zoological Society of Scotland, Edinburgh, UK
- 35 <sup>12</sup> Department of Integrative Biology, Oklahoma State University, 113 Life Sciences West,  
36 Stillwater, OK 74078, USA
- 37 <sup>13</sup> Life Sciences, The Natural History Museum, London SW7 5BD, UK
- 38 <sup>14</sup> Department of Ecology and Genetics, EBC, Uppsala University. Norbyv. 18D, SE-75236,  
39 Uppsala, Sweden
- 40 <sup>15</sup> Zoology Division, Endemic Species Research Institute, 1 Ming-shen East Road, Jiji,  
41 Nantou 552, Taiwan
- 42 <sup>16</sup> Helmholtz Centre for Environmental Research – UFZ, Department of Conservation  
43 Biology, Permoserstrasse 15, 04318 Leipzig, Germany
- 44 <sup>17</sup> ECOLAB, Université de Toulouse, CNRS, INPT, UPS, Toulouse, France
- 45 <sup>18</sup> Department of Pathology, Bacteriology and Avian Diseases, Faculty of Veterinary  
46 Medicine, Ghent University, Salisburylaan 133, B-9820 Merelbeke, Belgium
- 47 <sup>19</sup> PSL Research University, CEFE UMR 5175, CNRS, Université de Montpellier, Université  
48 Paul-Valéry Montpellier, EPHE, Biogéographie et Ecologie des vertébrés, Montpellier,  
49 France
- 50 <sup>20</sup> Amphibian and Reptile Conservation (ARC) Trust, 655A Christchurch Road, Boscombe,  
51 Bournemouth, Dorset, UK, BH1 4AP
- 52 <sup>21</sup> Durrell Wildlife Conservation Trust, Madagascar Programme, Madagascar
- 53 <sup>22</sup> Department of Evolutionary Biology and Environmental Studies, University of Zurich,  
54 Winterthurerstrasse 190, 8057 Zurich, Switzerland
- 55 <sup>23</sup> National Wildlife Management Centre, APHA, Woodchester Park, Gloucestershire GL10  
56 3UJ, UK
- 57 <sup>24</sup> Non-profit Association Zirichiltaggi - Sardinia Wildlife Conservation, Strada Vicinale  
58 Filigheddu 62/C, I-07100 Sassari, Italy
- 59 <sup>32</sup> ONG Ranita de Darwin, Nataniel Cox 152, Santiago, Chile
- 60 <sup>33</sup> Unit for Environmental Sciences and Management, Private Bag x6001, North-West  
61 University, Potchefstroom, 2520, South Africa
- 62 <sup>34</sup> Collection of Amphibians and Reptiles, Department of Zoology, Hungarian Natural  
63 History Museum, Budapest, Baross u. 13., 1088, Hungary
- 64 <sup>35</sup> School of Biology and Ecology, University of Maine, Orono, Maine 04469, USA
- 65 <sup>36</sup> Department of Ecology and Evolutionary Biology, University of Michigan, Ann Arbor,  
66 Michigan, 48109, USA

67 <sup>37</sup> Laboratório de História Natural de Anfíbios Brasileiros (LaHNAB), Departamento de  
68 Biologia Animal, Instituto de Biologia, Universidade Estadual de Campinas, Campinas, São  
69 Paulo, 13083-862, Brazil

70 <sup>38</sup> Department of Ecology and Evolutionary Biology, Cornell University, Ithaca, New York,  
71 14853, USA

72 <sup>39</sup> Centre for Ecology, Evolution and Environmental Changes (CE3C), Faculdade de Ciências  
73 da Universidade de Lisboa, Lisboa, Portugal

74 <sup>40</sup> IUCN SSC Amphibian Specialist Group-Madagascar, 101 Antananarivo, Madagascar

75 <sup>41</sup> Info Fauna Karch, Université de Neuchâtel, Bellevaux 51, UniMail Bâtiment 6, 2000  
76 Neuchâtel, Switzerland

77 <sup>42</sup> Centre for Genomic Pathogen Surveillance, Wellcome Genome Campus, Cambridgeshire,  
78 UK

79

80 \*Corresponding author. Email: [matthew.fisher@imperial.ac.uk](mailto:matthew.fisher@imperial.ac.uk)

81

82 ABSTRACT:

83 Parasitic chytrid fungi have emerged as a significant threat to amphibian species worldwide,  
84 necessitating the development of techniques to isolate these pathogens into sterile culture for  
85 research purposes. However, early methods of isolating chytrids from their hosts relied on  
86 killing amphibians. We modified a pre-existing protocol for isolating chytrids from infected  
87 animals to use toe clips and biopsies from toe webbing rather than euthanizing hosts, and  
88 distributed the protocol to interested researchers worldwide as part of the BiodivERSA  
89 project *RACE* – here called the *RML* protocol. In tandem, we developed a lethal procedure for  
90 isolating chytrids from tadpole mouthparts. Reviewing a database of use a decade after their  
91 inception, we find that these methods have been widely applied across at least 5 continents,  
92 23 countries and in 62 amphibian species, and have been successfully used to isolate chytrids  
93 in remote field locations. Isolation of chytrids by the non-lethal *RML* protocol occurred in  
94 18% of attempts with 207 fungal isolates and three species of chytrid being recovered.  
95 Isolation of chytrids from tadpoles occurred in 43% of attempts with 334 fungal isolates of  
96 one species (*Batrachochytrium dendrobatidis*) being recovered. Together, these methods  
97 have resulted in a significant reduction and refinement of our use of threatened amphibian  
98 species and have improved our ability to work with this important group of emerging fungal  
99 pathogens.

## 100 INTRODUCTION

101 A major consequence of globalisation has been the increase of invasive species owing to  
102 trade in live animals and plants. A further outcome of this process is the concomitant rise of  
103 novel emerging fungal pathogens (EFPs; (Farrer *et al.* 2017)) as these infections are moved  
104 within trade networks and establish in uninfected regions – an example of fungal ‘pathogen  
105 pollution’ (Fisher *et al.* 2012). Whilst EFPs can affect humans, they have also been broadly  
106 detrimental to natural populations of plants and animals, leading to worldwide losses of  
107 biodiversity. This dynamic has been most apparent across amphibians, where EFPs leading to  
108 population extirpation and species extinctions have contributed to amphibians now being the  
109 most endangered class of vertebrate (Stuart *et al.* 2004; Mendelson *et al.* 2006). In particular,  
110 emergence of parasitic fungi in the genus *Batrachochytrium* (phylum Chytridiomycota, order  
111 Rhizophydiales) have played a major role in driving amphibian population and species  
112 declines worldwide (Berger *et al.* 1998; Fisher *et al.* 2009).

113 While a single species, *Batrachochytrium dendrobatidis* (*Bd*), was originally thought to have  
114 caused the ongoing panzootic (James *et al.* 2009), we now know that amphibian  
115 chytridiomycosis is caused by a much broader swathe of phylogenetic diversity than was  
116 previously thought (Farrer *et al.* 2011; Schloegel *et al.* 2012). Next-generation sequencing  
117 and phylogenomic analyses have shown that *Bd sensu stricto* is composed of deep genetic  
118 lineages which are emerging through international trade in amphibians (Fisher *et al.* 2007;  
119 Schloegel *et al.* 2009; Schloegel *et al.* 2010). Superimposed upon this background of trade-  
120 associated lineages of *Bd* has come the recent discovery of a new species of pathogenic  
121 chytrid, also within the Rhizophydiales, *B. salamandrivorans* (*Bsal*; Martel *et al.* 2013). This  
122 pathogen has rapidly extirpated European fire salamanders (*Salamandra salamandra*) in the  
123 Netherlands and a broad screening of urodeles has shown that *Bsal* occurs naturally in  
124 southeast Asia where it appears to asymptotically infect salamander and newt species  
125 (Laking *et al.* 2017).

126 The ability to isolate and culture both *Bd* and *Bsal* has played a key role in catalysing  
127 research into their pathogenesis and virulence (Voyles *et al.* 2007; Rosenblum *et al.* 2012;  
128 Farrer *et al.* 2017), phenotypic characteristics (Piotrowski *et al.* 2004; Fisher *et al.* 2009;  
129 Becker *et al.* 2017) and a wealth of experimental studies on epidemiologically relevant  
130 parameters (Garner *et al.* 2009; Ribas *et al.* 2009; Rosenblum *et al.* 2012). Longcore *et al.*  
131 (1999) first isolated *Bd* from infected amphibians by modifying techniques used to isolate

132 other chytrids (Barr 1987). Longcore cleaned small (< 0.5mm dia) pieces of *Bd*-infected leg  
133 and foot skin by wiping them through agar and then placed skin pieces onto a clean plate of  
134 nutrient agar containing penicillin G and streptomycin. This method worked well for isolating  
135 from dead animals sent by courier from North and Central America. The method, however,  
136 requires euthanizing potentially healthy animals if their infection status was unknown.  
137 Further, it is difficult to perform this protocol in remote regions that lack suitable laboratory  
138 facilities, and the lethal sampling of amphibians may be contraindicated if the species is  
139 endangered, protected or located in protected areas.

140 We confronted this issue in a 2008-2014 project funded by BiodivERsA  
141 (<http://www.biodiversa.org>) – *RACE*: Risk Assessment of Chytridiomycosis to European  
142 amphibian biodiversity (Fisher *et al.* 2012). One of the objectives of this project was to adjust  
143 the protocol of Longcore *et al.* (1999) to (i) reduce the need to kill adult amphibians, (ii)  
144 improve rates of chytrid isolation by allowing the use of more animals, (iii) develop protocols  
145 that enabled isolation in a field setting, and, (iv) integrate the data into the GPS-smartphone  
146 enabled epidemiological software application *Epicollect* (Aanensen *et al.* 2009; Aanensen *et*  
147 *al.* 2014). Further, ‘forewarned is forearmed’ and we wished to determine whether the  
148 protocol was able to isolate other species of chytrid that are part of the amphibian skin  
149 microbiota, and that may present a biosecurity risk. This need to more broadly characterise  
150 global chytrid biodiversity was met by using resources from *RACE* to train researchers  
151 worldwide in chytrid isolation techniques to provide opportunities to characterise novel  
152 chytrids as they were discovered.

153 In addition to the non-lethal isolation protocol, a lethal method was developed in parallel to  
154 isolate chytrids from the mouthparts of larval amphibians. We describe this method as a  
155 refinement to the main isolation protocol.

## 156 METHODS

### 157 *Non-lethal field isolation of chytrids*

158 Animals were captured and held in separate plastic bags or suitable containers until ready for  
159 processing (Supp. Info. *RML* Protocol 1 and Supp. Info. Swabbing Protocol 2). Using clean  
160 gloves and sterilized dissection scissors or scalpel blades, the terminal 1-2mm of the  
161 phalanges of the 4<sup>th</sup> hind toe (counting from the proximal toe) was clipped and laid on the

162 surface of an mTGhL + antibiotic (200 mg/L penicillin-G and 400 mg/L streptomycin  
163 sulphate) agar plate. Alternatively, ~1mm toe-webbing biopsy punches were taken (Sklar  
164 instruments, PA, USA) then laid on a plate. This allowed multiple animals to be processed  
165 rapidly in the field. Subsequently, each tissue sample was transferred to a second plate with a  
166 sterile needle or forceps then cleaned (as far as possible) of surface-contaminating bacteria  
167 and fungi by dragging it through the agar-medium. The needle or forceps was then used to  
168 place the tissue sample in a sterile 2 ml screw-cap microtube containing liquid mTGhL  
169 medium with antibiotics, then stored in a cool, dry place. While 4 °C appears optimal, we  
170 have successfully used shaded regions of streams to cool cultures when refrigeration was not  
171 immediately available and have even held tubes and plates for several days at > 10 °C until  
172 suitable storage conditions were available.

173 Once back in the laboratory, samples in tubes were visually screened for evidence of yeast or  
174 bacterial contamination (when the media takes on a ‘cloudy’ appearance), or mycelial ‘balls’  
175 around the toe that are evidence of non-chytrid fungal contaminants. Visibly clear samples  
176 were decanted into a single well of a sterile 12-well lidded culture plate then incubated at  
177 18°C for up to 4 weeks, topping up with extra medium to counter evaporation as necessary.  
178 Depending on the size of the initial tissue sample, toe clips and webbing were divided into  
179 several smaller samples before transferring to liquid culture media.

#### 180 *Isolating chytrids from tadpoles*

181 Tadpoles often have higher burdens of infection than adults, especially long-lived tadpoles  
182 (Skerratt *et al.* 2008), and have higher densities and encounter rates than adults. In some  
183 situations where tadpoles were large and infections heavy, tadpoles were microscopically  
184 screened with a dissecting microscope or hand lens for areas of dekeratinization of the mouth  
185 parts, especially the jaw sheaths, that indicates infection (Fellers *et al.* 2001; Smith *et al.*  
186 2007). Tadpoles are killed before excising their mouthparts and these preliminary  
187 microscopic screens enabled us to use only a small number of animals to isolate chytrids.  
188 Additionally, uninfected and naïve tadpoles that were reared in captivity were used as live  
189 substrates to bait chytrids from adult amphibians with low levels of *Bd* infection (Bataille *et*  
190 *al.* 2013).

191 Susceptible tadpoles were reared until gills were resorbed and animals were free-swimming  
192 and feeding (developmental Gosner stage 25), because at earlier stages they are still

193 developing the keratinized mouthparts. Each tadpole container was then immersed within a  
194 similar but larger container that held at least one chytrid-infected animal. Water exchange  
195 between the infected and bait animal containers occurred through small holes (< 0.3 mm)  
196 drilled into the bottom of the walls of the smaller internal containers. Animals were held in  
197 these conditions for between 2 and 4 weeks at species-appropriate conditions. Tadpoles were  
198 periodically examined every fourth day for the presence of the depigmented areas in the jaw  
199 sheaths that have been associated with chytrid infection.

200 Isolating chytrids from tadpoles first required killing by immersion in a 5 g/L solution of MS-  
201 222 (Torreilles *et al.* 2009) or other approved method. Note that anaesthetics which contain  
202 ethanol, such as phenoxyethanol (Gentz 2007), should be avoided as these will kill chytrids  
203 while MS222 is not toxic (Webb *et al.* 2005). We then dissected out keratinized jaw sheaths  
204 and cleaned the entire sheath, or sections, as above using an agar plate with antibiotics  
205 ((Longcore *et al.* 1999); Supp. Info. *RML* Protocol 1). Cleaned sections were then placed  
206 singly into sterile 12-well culture plates with 1 mL liquid media + antibiotics, or onto agar  
207 plates with 6 – 10 sections per plate, and incubated at 10 – 20 °C.

208 Because zoospore release may occur immediately, especially from tadpole mouthparts,  
209 cultures were examined with an inverted microscope for the presence of active zoospores  
210 every day for up to one week following the day that they were initiated. After that, checks  
211 every two days were sufficient.

#### 212 *Culture and diagnosis of chytrid isolates*

213 Subsequent culture methods for *Bd* followed those of Longcore *et al.* (1999). When isolation  
214 of *Bsal* was anticipated an incubation temperature of 15 °C was required (Bloom *et al.* 2015)  
215 whereas a temperature of 18 – 22 °C is closer to the measured growth optimum of *Bd*  
216 (Longcore *et al.* 1999; Ribas *et al.* 2009). Once growth of zoospores and/or zoosporangia was  
217 observed, 100 – 500 µL volume of culture containing zoospores and zoosporangia was  
218 transferred by pipette to a new 12-well plate with liquid medium and no antibiotics, and  
219 incubated at 15 – 20 °C. All successfully cultured isolates were subcultured into larger  
220 volumes, then centrifuged at 1700 g for 10 min before cryopreservation. A portion of the  
221 initial pellet was also be used for DNA extraction, while the remaining volume was  
222 resuspended in 10% DMSO and 10% FCS in liquid media and transferred into six 2 mL  
223 cryotubes for cryopreservation at -80 °C (Boyle *et al.* 2003).

224 We confirmed the identity of *Bd* and *Bsal* by quantitative PCR with an MGB Taqman probe  
225 assay in either single-plex or multiplex (Boyle *et al.* 2004; Blooi *et al.* 2013). We identified  
226 non-*Batrachochytrium* chytrids was achieved by sequencing appropriate regions of the  
227 ribosomal RNA gene with universal fungal primers followed by comparison against OTUs  
228 held in UNITE database (Unified system for DNA-based fungal species linked to  
229 classification: <https://unite.ut.ee>) to establish a species-hypothesis for the chytrid isolate in  
230 question (Schoch *et al.* 2012). If further genetic data were required, then multilocus analysis  
231 or whole-genome sequencing was undertaken using chytrid-specific methods (James *et al.*  
232 2009; Farrer *et al.* 2013; Farrer *et al.* 2017; Farrer *et al.* 2017).

### 233 *Collation of data*

234 To track and report chytrid isolation for the *RACE* project, we used a generic data collection  
235 tool that allows the collection and submission of geotagged data forms from field locations,  
236 *Epicollect5* (<https://five.epicollect.net>). This software has the advantage that it can be used on  
237 mobile devices with or without internet connection, and allows the immediate sharing of data  
238 across the research community. Our database at  
239 <https://five.epicollect.net/project/bd-global-isolation-protocol> included the following data  
240 fields: Date; Continent, Country, Site name; Latitude/Longitude; Wild caught or trade?;  
241 Amphibian species; Life history stage; Number sampled; Chytrid isolated?; Number isolated;  
242 Species of chytrid isolated; Chytrid lineage; Photograph of amphibian; Name of researchers.

## 243 RESULTS

244 The ‘*RACE* modified Longcore (*RML*) Protocol’ for the non-lethal isolation of chytrids from  
245 amphibians is detailed in Supp. Info. 1. Ensure that you have the relevant licences, permits  
246 and permissions from ethical committees to follow the *RML* protocol 1, swabbing protocol 2  
247 and isolation from larval amphibians.

### 248 *Non-lethal isolation from adult and juvenile amphibians*

249 Following the formalisation and distribution of the *RACE* protocols, our *Epicollect5* project  
250 summarised chytrid surveys from 2007 through to 2017 (Table 1). The *Epicollect5* database  
251 can be spatially visualised at  
252 <https://five.epicollect.net/project/bd-global-isolation-protocol/data>. Figure 1 depicts the



253 isolation of amphibian-associated chytrids using the *RACE* protocols from 5 continents  
254 (Africa, Asia, Australia, Europe and South America), 23 countries, 239 sampling episodes,  
255 and from latitudes spanning -44.1 S (*Batrachyla antartandica*, Chile) through to 55.6 N (*Bufo*  
256 *viridis*, Sweden). Chytrids have been non-lethally isolated from 34 amphibian species, of  
257 which 28 were anuran and 5 were caudatan species. The database also contains 5 records of  
258 chytrids that were non-lethally sampled from the amphibian trade.

259 In total, 1,152 animals were non-lethally sampled, recovering 207 chytrid isolates and  
260 resulting in a recovery rate of 18% (~1 isolate per 5 animals sampled). Of these chytrids, 203  
261 (98%) were *Bd*, 2 were *Rhizophydium* sp., 2 were *Kappamyces* sp. and none were *Bsal* (Table  
262 1). Of the *Bd* isolated, 42 (88%) were determined to be *BdGPL*, 5 (10%) were *BdCAPE*, and  
263 1 (2%) was *BdCH*.

#### 264 *Isolation of chytrids from larval amphibians*

265 In total, 784 tadpoles were sampled recovering 334 chytrid isolates and resulting in a  
266 recovery rate of 43% (~1 isolate per 2 – 3 animals sampled). Isolates were recovered from 34  
267 species of amphibian, all of which were anurans (Table 2). These chytrid isolates were all *Bd*  
268 and, of the lineages recorded, 129 (78%) were *BdGPL*, 34 (20%) were *BdBRAZIL* and 3  
269 (2%) were hybrids.

270 Baiting chytrid isolates from live adult animals using tadpoles was used successfully in South  
271 Korean *Bombina orientalis* as previously described (Bataille *et al.* 2013). Here, six tadpoles  
272 were co-housed with adult *B. orientalis*, yielding a single isolate of *Bd* for each attempt  
273 equating to a rate of success of ~20%.

#### 274 DISCUSSION

275 The *RML* protocol, based on the original suggestions of Joyce Longcore for the non-lethal  
276 isolation of chytrids from amphibians, has been a success with isolates of chytrids recorded  
277 from five continents. There are likely many other unrecorded uses of this method because this  
278 protocol has been widely dispersed during the 5-year span (2008-2014) of the *RACE* project  
279 which trained a cohort of amphibian disease researchers in these techniques.

280 In some circumstances chytrids could not be recovered from toe-clips when sampling  
281 populations with persistent infection despite repeated attempts. This was particularly evident

282 when the prevalence and burden of chytrid infections in surveys was low (Swei *et al.* 2011;  
283 Bataille *et al.* 2013; Laking *et al.* 2017) or when host species occupied habitats with high  
284 bacterial and/or non-target fungal contaminants. In these situations we isolated chytrids from  
285 tadpole mouthparts as an associated method to the *RML* protocol. The value of the *RML*  
286 protocol in propelling forward research on amphibian chytridiomycosis has been very clear:  
287 for instance, of the 59 scientific papers produced by *RACE*, 15 directly used isolates of *Bd*  
288 that were generated by this protocol for experimental trials (Supp. Info. 3). Further,  
289 subsequently many more studies using these isolates have extended our knowledge of the  
290 genetic diversity of *Bd* (James *et al.* 2009; Farrer *et al.* 2011; Farrer *et al.* 2013; Jenkinson *et*  
291 *al.* 2016), the development of novel diagnostics (Dillon *et al.* 2017), the genetic repertoire  
292 that underpins the virulence of these pathogens (Rosenblum *et al.* 2012; Farrer *et al.* 2017)  
293 and the biogeographic distributions of *Bd* diversity worldwide (Farrer *et al.* 2011; Jenkinson  
294 *et al.* 2016).

295 Clearly some uncontrolled biases and unanswered questions in these studies need attention.  
296 First, the majority of *Bd* isolates belong to the *BdGPL* lineage. This could be because this  
297 lineage is more widespread (and therefore more readily recovered) than other lineages (James  
298 *et al.* 2015), or it could be that the intensity of *BdGPL* infections and/or the rate of zoospore  
299 production is higher than for other lineages, which would also equate to a higher rate of  
300 isolation. To achieve a true and unbiased understanding of the distribution of these lineages, a  
301 lineage-specific diagnostic will need to be developed and deployed. Second, if lineage-  
302 specific differences in the probability of successful isolation exist, then mixed infections  
303 where these lineages co-occur may not be detected. This can be controlled for by isolating  
304 and genotyping many isolates from a single host and population, although this may not fully  
305 account for this bias. A related bias is that not all infectious species of chytrid will respond  
306 equally to culturing attempts. For instance, despite known attempts to isolate *Bsal* from  
307 across its endemic southeast Asian range using the protocol, to date no successful isolations  
308 of *Bsal* have been recorded. This is likely due to a combination of the low prevalence and  
309 burden of infection in salamanders and newts combined with the low initial growth-rate of  
310 *Bsal* (Martel *et al.* 2013; Laking *et al.* 2017). With the *RML* protocol, however, workers have  
311 been able to isolate non-*Bd* species of chytrid (*e.g.*, *Kappamyces* spp. and *Rhizophydium* sp.  
312 Table 1). This diversity likely represents only a fraction of the diversity of amphibian-  
313 associated chytrids that occur, and non-biased estimators of this diversity by, for instance,  
314 profiling the nuclear ribosomal RNA cistron (Schoch *et al.* 2012), are sorely needed.

315 In this age of the global amphibian crisis, research on the effects of chytrid infections is  
316 transitioning to attempts to mitigate their impacts (Schmeller *et al.* 2014; Garner *et al.* 2016;  
317 Canessa *et al.* 2018). Both of these research streams benefit from the availability of chytrid  
318 isolates, but the ethics behind these research programs can be improved. To that end, our data  
319 on isolation success suggest that tadpoles are a better target for isolation than metamorphosed  
320 animals. This is to some degree unfortunate, because isolation from tadpoles requires killing.  
321 However we have outlined one refinement where captive reared tadpoles can be used to ‘bait’  
322 infections from wild-caught amphibians to isolate chytrids without killing adult amphibians.  
323 Here, it is important to recognise that amphibians which have been co-housed in collections  
324 should not be returned to the wild due to the danger of cross-transmission of pathogens  
325 during husbandry (Walker *et al.* 2008). If it is necessary to isolate chytrids directly from wild  
326 tadpoles without using bait animals, we suggest that researchers focus on more fecund  
327 species with long larval periods as the focal species in aquatic amphibian communities.  
328 Removal of small numbers of tadpoles when clutch sizes are in the hundreds or thousands  
329 means that removals will have an insignificant ecological impact; for this reason sacrificing  
330 tadpoles is preferable to killing adult animals.

331 The extent to which toe-clipping effects the fitness of amphibians has been much debated  
332 (*e.g.* May (2004) but see Funk *et al.* (2005)). Toe-clipping has been shown to decrease  
333 amphibian survival, but this effect, when present, is linearly related to the number of toes  
334 removed (McCarthy *et al.* 2004; Ulmar Grafe *et al.* 2011). For the single toe-clip that the  
335 *RML* protocol requires, reduction in survival appears to be negligible (Ott *et al.* 1999; Funk *et*  
336 *al.* 2005), and toe clipping is certainly preferred to killing the animal. Attention should be  
337 paid to this issue, however, and, where appropriate, survival estimates should be undertaken  
338 to determine the health implications of this procedure. Also, antiseptic and analgesic  
339 protocols can be considered to ensure that wounds where tissue samples are excised are at  
340 low risk of secondary infection (Chevalier *et al.* 2017).

341 In summary, modification of Longcore’s original *Bd*-isolation protocol (Longcore *et al.*  
342 1999) has enabled a broad community of scientists to engage with research on emerging  
343 chytrid pathogens of amphibians. This research has had an impact worldwide, and is  
344 contributing to the ongoing dialogue that is occurring between scientists, conservationists and  
345 policy-makers about how we might mitigate against these infections now and into the future.

346 ACKNOWLEDGMENTS

347 **Data accessibility:** <https://five.epicollect.net/project/bd-global-isolation-protocol>

348 **Grants:** TWJG, MCF, DSS, AL, EC, FCC, JB, AAC, CM, FS, BRS were supported through  
349 the Biodiversa project RACE: Risk Assessment of Chytridiomycosis to European Amphibian  
350 Biodiversity (NERC standard grant NE/K014455/1 and NE/E006701/1; ANR-08-BDVA-  
351 002-03). MCF, JS, CW, PG were supported by the Leverhulme Trust RPG-2014-273, MCF,  
352 AC, CW were supported by the Morris Animal Foundation. JV was supported by the  
353 Bolyai János Research Grant of the Hungarian Academy of Sciences (BO/00597/14). FG and  
354 DG were supported by the Conservation Leadership Programme Future Conservationist  
355 Award. CSA was supported by Fondecyt No. 1181758. MCF and AC were supported by  
356 Mohamed bin Zayed Species Conservation Fund Project 152510704. GMR held a doctoral  
357 scholarship (SFRH/BD/69194/2010) from Fundação para a Ciência e a Tecnologia (FCT).  
358 LFT, CL, LPR KRZ, TYJ, TSJ were supported by São Paulo Research Foundation (FAPESP  
359 #2016/25358-3), the National Counsel of Technological and Scientific Development (CNPq  
360 #300896/2016-6) and a Catalyzing New International Collaborations grant from the United  
361 States NSF (OISE-1159513). CSA was supported by Fondecyt No. 1181758

362

363

## References

364

- 365 1. Aanensen, D. M., D. M. Huntley, E. J. Feil, F. al-Own and B. G. Spratt (2009). "EpiCollect:  
366 Linking Smartphones to Web Applications for Epidemiology, Ecology and Community  
367 Data Collection." *Plos One* **4**(9).
- 368 2. Aanensen, D. M., D. M. Huntley, M. Menegazzo, C. I. Powell and B. G. Spratt (2014).  
369 "EpiCollect+: linking smartphones to web applications for complex data collection  
370 projects." *F1000Res* **3**: 199.
- 371 3. Barr, D. J. S. (1987). Isolation, culture and identification of Chytridiales, Spizellomycetales,  
372 and Hypocreales. *Zoosporic fungi in teaching and research*. M. S. Fuller and A.  
373 Jaworski. Athens, Georgia, Southeastern Publishing Corp.: p 118-120.
- 374 4. Bataille, A., J. J. Fong, M. Cha, G. O. U. Wogan, H. J. Baek, H. Lee, M. S. Min and B.  
375 Waldman (2013). "Genetic evidence for a high diversity and wide distribution of  
376 endemic strains of the pathogenic chytrid fungus *Batrachochytrium dendrobatidis* in  
377 wild Asian amphibians." *Molecular Ecology* **22**(16): 4196-4209.
- 378 5. Becker, C. G., S. E. Greenspan, K. E. Tracy, J. A. Dash, C. Lambertini, T. S. Jenkinson, D. S.  
379 Leite, L. F. Toledo, J. E. Longcore, T. Y. James and K. R. Zamudio (2017). "Variation in  
380 phenotype and virulence among enzootic and panzootic amphibian chytrid  
381 lineages." *Fungal Ecology* **26**: 45-50.
- 382 6. Berger, L., R. Speare, P. Daszak, D. E. Green, A. A. Cunningham, C. L. Goggin, R. Slocombe,  
383 M. A. Ragan, A. H. Hyatt, K. R. McDonald, H. B. Hines, K. R. Lips, G. Marantelli and H.  
384 Parkes (1998). "Chytridiomycosis causes amphibian mortality associated with  
385 population declines in the rain forests of Australia and Central America."  
386 *Proceedings of the National Academy of Science, USA* **95**: 9031-9036.

- 387 7. Blooi, M., A. Martel, F. Haesebrouck, F. Vercammen, D. Bonte and F. Pasmans (2015).  
388 "Treatment of urodelans based on temperature dependent infection dynamics of  
389 *Batrachochytrium salamandrivorans*." Scientific Reports **5**.
- 390 8. Blooi, M., F. Pasmans, J. E. Longcore, A. Spitzen-van der Sluijs, F. Vercammen and A.  
391 Martel (2013). "Duplex Real-Time PCR for Rapid Simultaneous Detection of  
392 *Batrachochytrium dendrobatidis* and *Batrachochytrium salamandrivorans* in  
393 Amphibian Samples." Journal of Clinical Microbiology **51**(12): 4173-4177.
- 394 9. Boyle, D. G., D. B. Boyle, V. Olsen, J. A. T. Morgan and A. D. Hyatt (2004). "Rapid  
395 quantitative detection of chytridiomycosis (*Batrachochytrium dendrobatidis*) in  
396 amphibian samples using real-time Taqman PCR assay." Diseases of Aquatic  
397 Organisms **60**(2): 141-148.
- 398 10. Boyle, D. G., A. D. Hyatt, P. Daszak, L. Berger, J. E. Longcore, D. Porter, S. G.  
399 Hengstberger and V. Olsen (2003). "Cryo-archiving of *Batrachochytrium*  
400 *dendrobatidis* and other chytridiomycetes." Dis Aquat Organ **56**(1): 59-64.
- 401 11. Canessa, S., C. Bozzuto, E. H. C. Grant, S. S. Cruickshank, M. C. Fisher, J. C. Koella, S.  
402 Lötters, A. Martel, F. Pasmans, B. C. Scheele, A. Spitzen-van der Sluijs, S. S. and B. R.  
403 Schmidt (2018). "Decision making for mitigating emerging wildlife diseases: from  
404 theory to practice for an emerging fungal pathogen of salamanders. ." Journal of  
405 Applied Ecology.
- 406 12. Chevalier, H., O. Calvez, A. MArtinez-Silvestre, D. Picard, S. Guerin, F. Isselin-Nondedeu,  
407 A. Riberon and A. Trochet (2017). "Marking techniques in the Marbled Newt (  
408 *Triturus marmoratus* ): PIT-Tag and tracking device implant protocols." Acta  
409 Herpetologica **12**(1): 79-88.
- 410 13. Dillon, M. J., A. E. Bowkett, M. J. Bungard, K. M. Beckman, M. F. O'Brien, K. Bates, M. C.  
411 Fisher, J. R. Stevens and C. R. Thornton (2017). "Tracking the amphibian pathogens  
412 *Batrachochytrium dendrobatidis* and *Batrachochytrium salamandrivorans* using a  
413 highly specific monoclonal antibody and lateral- flow technology." Microbial  
414 Biotechnology **10**(2): 381-394.
- 415 14. Farrer, R. A. and M. C. Fisher (2017). "Describing Genomic and Epigenomic Traits  
416 Underpinning Emerging Fungal Pathogens." Adv Genet **100**: 73-140.
- 417 15. Farrer, R. A., D. A. Henk, T. W. J. Garner, F. Balloux, D. C. Woodhams and M. C. Fisher  
418 (2013). "Chromosomal Copy Number Variation, Selection and Uneven Rates of  
419 Recombination Reveal Cryptic Genome Diversity Linked to Pathogenicity." Plos  
420 Genetics **9**(8).
- 421 16. Farrer, R. A., A. Martel, E. Verbrugghe, A. Abouelleil, R. Ducatelle, J. E. Longcore, T. Y.  
422 James, F. Pasmans, M. C. Fisher and C. A. Cuomo (2017). "Genomic innovations  
423 linked to infection strategies across emerging pathogenic chytrid fungi." Nat  
424 Commun **8**: 14742.
- 425 17. Farrer, R. A., L. A. Weinert, J. Bielby, T. W. J. Garner, F. Balloux, F. Clare, J. Bosch, A. A.  
426 Cunningham, C. Weldon, L. H. du Preez, L. Anderson, S. L. K. Pond, R. Shahr-Golan,  
427 D. A. Henk and M. C. Fisher (2011). "Multiple emergences of genetically diverse  
428 amphibian-infecting chytrids include a globalized hypervirulent recombinant  
429 lineage." Proceedings of the National Academy of Sciences of the United States of  
430 America **108**(46): 18732-18736.
- 431 18. Fellers, G. M., D. E. Green and J. E. Longcore (2001). "Oral chytridiomycosis in the  
432 mountain yellow-legged frog (*Rana muscosa*)." Copeia(4): 945-953.

- 433 19. Fisher, M. C., J. Bosch, Z. Yin, D. A. Stead, J. Walker, L. Selway, A. J. P. Brown, L. A.  
434 Walker, N. A. R. Gow, J. E. Stajich and T. W. J. Garner (2009). "Proteomic and  
435 phenotypic profiling of the amphibian pathogen *Batrachochytrium dendrobatidis*  
436 shows that genotype is linked to virulence." Molecular Ecology **18**(3): 415-429.
- 437 20. Fisher, M. C. and T. W. J. Garner (2007). "The relationship between the introduction of  
438 *Batrachochytrium dendrobatidis*, the international trade in amphibians and  
439 introduced amphibian species." Fungal Biology Reviews **21**: 2-9.
- 440 21. Fisher, M. C., T. W. J. Garner and S. F. Walker (2009). "Global Emergence of  
441 *Batrachochytrium dendrobatidis* and Amphibian Chytridiomycosis in Space, Time,  
442 and Host." Annual Review of Microbiology **63**: 291-310.
- 443 22. Fisher, M. C., D. A. Henk, C. J. Briggs, J. S. Brownstein, L. C. Madoff, S. L. McCraw and S.  
444 J. Gurr (2012). "Emerging fungal threats to animal, plant and ecosystem health."  
445 Nature **484**(7393): 186-194.
- 446 23. Fisher, M. C., B. R. Schmidt, K. Henle, D. S. Schmeller, J. Bosch, D. M. Aanensen and T. J.  
447 W. Garner (2012). "RACE: Risk Assessment of Chytridiomycosis to European  
448 Amphibian Biodiversity. ." Froglog(101): 45-47.
- 449 24. Funk, W. C., M. A. Donnelly and K. R. Lips (2005). "Alternative views of amphibian toe-  
450 clipping." Nature **433**(7023): 193-193.
- 451 25. Garner, T. W., B. R. Schmidt, A. Martel, F. Pasmans, E. Muths, A. A. Cunningham, C.  
452 Weldon, M. C. Fisher and J. Bosch (2016). "Mitigating amphibian chytridiomycoses in  
453 nature." Philos Trans R Soc Lond B Biol Sci **371**(1709).
- 454 26. Garner, T. W., S. Walker, J. Bosch, S. Leech, M. Rowcliffe, A. A. Cunningham and M. C.  
455 Fisher (2009). "Life history trade-offs influence mortality associated with the  
456 amphibian pathogen *Batrachochytrium dendrobatidis*." Oikos(118): 783-791.
- 457 27. Gentz, E. J. (2007). "Medicine and surgery of amphibians." ILAR J (48): 255-259.
- 458 28. James, T. Y., A. Litvintseva, R. Vilgalys, J. A. Morgan, J. W. Taylor, M. C. Fisher, L. Berger,  
459 C. Weldon, L. H. du Preez and J. Longcore (2009). "Rapid expansion of an emerging  
460 fungal disease into declining and healthy amphibian populations." PLoS Pathogens  
461 **5**(5): e1000458.
- 462 29. James, T. Y., L. F. Toledo, D. Rodder, D. D. Leite, A. M. Belasen, C. M. Betancourt-Roman,  
463 T. S. Jenkinson, C. Soto-Azat, C. Lambertini, A. V. Longo, J. Ruggeri, J. P. Collins, P. A.  
464 Burrowes, K. R. Lips, K. R. Zamudio and J. E. Longcore (2015). "Disentangling host,  
465 pathogen, and environmental determinants of a recently emerged wildlife disease:  
466 lessons from the first 15years of amphibian chytridiomycosis research." Ecology and  
467 Evolution **5**(18): 4079-4097.
- 468 30. Jenkinson, T. S., C. M. B. Roman, C. Lambertini, A. Valencia-Aguilar, D. Rodriguez, C. H. L.  
469 Nunes-de-Almeida, J. Ruggeri, A. M. Belasen, D. D. Leite, K. R. Zamudio, J. E.  
470 Longcore, L. F. Toledo and T. Y. James (2016). "Amphibian-killing chytrid in Brazil  
471 comprises both locally endemic and globally expanding populations." Molecular  
472 Ecology **25**(13): 2978-2996.
- 473 31. Laking, A. E., H. N. Ngo, F. Pasmans, A. Martel and T. T. Nguyen (2017).  
474 "*Batrachochytrium salamandrivorans* is the predominant chytrid fungus in  
475 Vietnamese salamanders." Scientific Reports **7**.
- 476 32. Longcore, J. E., A. P. Pessier and D. K. Nichols (1999). "*Batrachochytrium dendrobatidis*  
477 gen et sp nov, a chytrid pathogenic to amphibians." Mycologia **91**(2): 219-227.
- 478 33. Martel, A., A. Spitzen-van der Sluijs, M. Blooi, W. Bert, R. Ducatelle, M. C. Fisher, A.  
479 Woeltjes, W. Bosman, K. Chiers, F. Bossuyt and F. Pasmans (2013).

- 480 "Batrachochytrium salamandrivorans" sp nov causes lethal chytridiomycosis in  
481 amphibians." Proceedings of the National Academy of Sciences of the United States  
482 of America **110**(38): 15325-15329.
- 483 34. May, R. M. (2004). "Ecology - Ethics and amphibians." Nature **431**(7007): 403-403.
- 484 35. McCarthy, M. A. and K. M. Parris (2004). "Clarifying the effect of toe clipping on frogs  
485 with Bayesian statistics." Journal of Applied Ecology **41**(4): 780-786.
- 486 36. Mendelson, J. R., 3rd, K. R. Lips, R. W. Gagliardo, G. B. Rabb, J. P. Collins, J. E.  
487 Diffendorfer, P. Daszak, D. R. Ibanez, K. C. Zippel, D. P. Lawson, K. M. Wright, S. N.  
488 Stuart, C. Gascon, H. R. da Silva, P. A. Burrowes, R. L. Joglar, E. La Marca, S. Lotters, L.  
489 H. du Preez, C. Weldon, A. Hyatt, J. V. Rodriguez-Mahecha, S. Hunt, H. Robertson, B.  
490 Lock, C. J. Raxworthy, D. R. Frost, R. C. Lacy, R. A. Alford, J. A. Campbell, G. Parra-  
491 Olea, F. Bolanos, J. J. Domingo, T. Halliday, J. B. Murphy, M. H. Wake, L. A. Coloma, S.  
492 L. Kuzmin, M. S. Price, K. M. Howell, M. Lau, R. Pethiyagoda, M. Boone, M. J. Lannoo,  
493 A. R. Blaustein, A. Dobson, R. A. Griffiths, M. L. Crump, D. B. Wake and E. D. Brodie,  
494 Jr. (2006). "Biodiversity. Confronting amphibian declines and extinctions." Science  
495 **313**(5783): 48.
- 496 37. Ott, J. A. and D. E. Scott (1999). "Effects of toe-clipping and PIT-tagging on growth and  
497 survival in metamorphic *Ambystoma opacum*." Journal of Herpetology **33**(2): 344-  
498 348.
- 499 38. Piotrowski, J. S., S. L. Annis and J. E. Longcore (2004). "Physiology of *Batrachochytrium*  
500 *dendrobatidis*, a chytrid pathogen of amphibians." Mycologia **96**(1): 9-15.
- 501 39. Ribas, L., M. S. Li, B. J. Doddington, J. Robert, J. A. Seidel, J. S. Kroll, L. B. Zimmerman, N.  
502 C. Grassly, T. W. J. Garner and M. C. Fisher (2009). "Expression Profiling the  
503 Temperature-Dependent Amphibian Response to Infection by *Batrachochytrium*  
504 *dendrobatidis*." PLoS One **4**(12): -.
- 505 40. Rosenblum, E. B., T. J. Poorten, S. Joneson and M. Settles (2012). "Substrate-Specific  
506 Gene Expression in *Batrachochytrium dendrobatidis*, the Chytrid Pathogen of  
507 Amphibians." Plos One **7**(11).
- 508 41. Rosenblum, E. B., T. J. Poorten, M. Settles and G. K. Murdoch (2012). "Only skin deep:  
509 shared genetic response to the deadly chytrid fungus in susceptible frog species."  
510 Molecular Ecology **21**(13): 3110-3120.
- 511 42. Schloegel, L. M., C. M. Ferreira, T. Y. James, M. Hipolito, J. E. Longcore, A. D. Hyatt, M.  
512 Yabsley, A. M. C. R. P. F. Martins, R. Mazzoni, A. J. Davies and P. Daszak (2010). "The  
513 North American bullfrog as a reservoir for the spread of *Batrachochytrium*  
514 *dendrobatidis* in Brazil." Animal Conservation **13**: 53-61.
- 515 43. Schloegel, L. M., A. M. Picco, A. M. Kilpatrick, A. J. Davies, A. D. Hyatt and P. Daszak  
516 (2009). "Magnitude of the US trade in amphibians and presence of *Batrachochytrium*  
517 *dendrobatidis* and ranavirus infection in imported North American bullfrogs (*Rana*  
518 *catesbeiana*)." Biological Conservation **142**(7): 1420-1426.
- 519 44. Schloegel, L. M., L. F. Toledo, J. E. Longcore, S. E. Greenspan, C. A. Vieira, M. Lee, S.  
520 Zhao, C. Wangen, C. M. Ferreira, M. Hipolito, A. J. Davies, C. A. Cuomo, P. Daszak and  
521 T. Y. James (2012). "Novel, panzootic and hybrid genotypes of amphibian  
522 chytridiomycosis associated with the bullfrog trade." Molecular Ecology **21**(21):  
523 5162-5177.
- 524 45. Schmeller, D. S., M. Blooi, A. Martel, T. W. J. Garner, M. C. Fisher, F. Azemar, F. C. Clare,  
525 C. Leclerc, L. Jager, M. Guevara-Nieto, A. Loyau and F. Pasmans (2014). "Microscopic

- 526 Aquatic Predators Strongly Affect Infection Dynamics of a Globally Emerged  
527 Pathogen." Current Biology **24**(2): 176-180.
- 528 46. Schoch, C. L., K. A. Seifert, S. Huhndorf, V. Robert, J. L. Spouge, C. A. Levesque, W. Chen,  
529 E. Bolchacova, K. Voigt, P. W. Crous, A. N. Miller, M. J. Wingfield, M. C. Aime, K. D.  
530 An, F. Y. Bai, R. W. Barreto, D. Begerow, M. J. Bergeron, M. Blackwell, T. Boekhout,  
531 M. Bogale, N. Boonyuen, A. R. Burgaz, B. Buyck, L. Cai, Q. Cai, G. Cardinali, P.  
532 Chaverri, B. J. Coppins, A. Crespo, P. Cubas, C. Cummings, U. Damm, Z. W. de Beer, G.  
533 S. de Hoog, R. Del-Prado, D. B. J. Dieguez-Uribeondo, P. K. Divakar, B. Douglas, M.  
534 Duenas, T. A. Duong, U. Eberhardt, J. E. Edwards, M. S. Elshahed, K. Fliegerova, M.  
535 Furtado, M. A. Garcia, Z. W. Ge, G. W. Griffith, K. Griffiths, J. Z. Groenewald, M.  
536 Groenewald, M. Grube, M. Gryzenhout, L. D. Guo, F. Hagen, S. Hambleton, R. C.  
537 Hamelin, K. Hansen, P. Harrold, G. Heller, G. Herrera, K. Hirayama, Y. Hirooka, H. M.  
538 Ho, K. Hoffmann, V. Hofstetter, F. Hognabba, P. M. Hollingsworth, S. B. Hong, K.  
539 Hosaka, J. Houbraken, K. Hughes, S. Huhtinen, K. D. Hyde, T. James, E. M. Johnson, J.  
540 E. Johnson, P. R. Johnston, E. B. Jones, L. J. Kelly, P. M. Kirk, D. G. Knapp, U. Koljalg, K.  
541 GM, C. P. Kurtzman, S. Landvik, S. D. Leavitt, A. S. Liggenstoffer, K. Liimatainen, L.  
542 Lombard, J. J. Luangsa-Ard, H. T. Lumbsch, H. Maganti, S. S. Maharachchikumbura,  
543 M. P. Martin, T. W. May, A. R. McTaggart, A. S. Methven, W. Meyer, J. M. Moncalvo,  
544 S. Mongkolsamrit, L. G. Nagy, R. H. Nilsson, T. Niskanen, I. Nyilasi, G. Okada, I. Okane,  
545 I. Olariaga, J. Otte, T. Papp, D. Park, T. Petkovits, R. Pino-Bodas, W. Quaedvlieg, H. A.  
546 Raja, D. Redecker, R. T. C. Ruibal, J. M. Sarmiento-Ramirez, I. Schmitt, A. Schussler, C.  
547 Shearer, K. Sotome, F. O. Stefani, S. Stenroos, B. Stielow, H. Stockinger, S. Suetrong,  
548 S. O. Suh, G. H. Sung, M. Suzuki, K. Tanaka, L. Tedersoo, M. T. Telleria, E. Tretter, W.  
549 A. Untereiner, H. Urbina, C. Vagvolgyi, A. Vialle, T. D. Vu, G. Walther, Q. M. Wang, Y.  
550 Wang, B. S. Weir, M. Weiss, M. M. White, J. Xu, R. Yahr, Z. L. Yang, A. Yurkov, J. C.  
551 Zamora, N. Zhang, W. Y. Zhuang, D. Schindel and F. B. Consortium (2012). "Nuclear  
552 ribosomal internal transcribed spacer (ITS) region as a universal DNA barcode marker  
553 for Fungi." Proceedings of the National Academy of Sciences of the United States of  
554 America **109**(16): 6241-6246.
- 555 47. Skerratt, L. F., L. Berger, H. B. Hines, K. R. McDonald, D. Mendez and R. Speare (2008).  
556 "Survey protocol for detecting chytridiomycosis in all Australian frog populations."  
557 Diseases of Aquatic Organisms **80**(2): 85-94.
- 558 48. Smith, K. G. and C. Weldon (2007). "A Conceptual Framework for Detecting Oral  
559 Chytridiomycosis in Tadpoles." Copeia **4**: 1024-1028.
- 560 49. Stuart, S. N., J. S. Chanson, N. A. Cox, B. E. Young, A. S. Rodrigues, D. L. Fischman and R.  
561 W. Waller (2004). "Status and trends of amphibian declines and extinctions  
562 worldwide." Science **306**(5702): 1783-1786.
- 563 50. Swei, A., J. J. L. Rowley, D. Rodder, M. L. L. Diesmos, A. C. Diesmos, C. J. Briggs, R.  
564 Brown, T. T. Cao, T. L. Cheng, R. A. Chong, B. Han, J. M. Hero, H. D. Hoang, M. D.  
565 Kusri, T. T. L. Duong, J. A. McGuire, M. Meegaskumbura, M. S. Min, D. G. Mulcahy,  
566 T. Neang, S. Phimmachak, D. Q. Rao, N. M. Reeder, S. D. Schoville, N. Sivongxay, N.  
567 Srei, M. Stock, B. L. Stuart, L. S. Torres, T. A. T. Dao, T. S. Tunstall, D. Vieites and V. T.  
568 Vredenburg (2011). "Is Chytridiomycosis an Emerging Infectious Disease in Asia?"  
569 Plos One **6**(8).
- 570 51. Torreilles, S. L., D. E. McClure and S. L. Green (2009). "Evaluation and Refinement of  
571 Euthanasia Methods for *Xenopus laevis*." Journal of the American Association for  
572 Laboratory Animal Science **48**(5): 512-516.



- 573 52. Ulmar Grafe, T., M. M. Stewart, K. P. Lampert and M.-O. Rödel (2011). "Putting Toe  
574 Clipping into Perspective: A Viable Method for Marking Anurans." Journal of  
575 Herpetology **45**(1): 28-35.
- 576 53. Voyles, J., L. Berger, S. Young, R. Speare, R. Webb, J. Warner, D. Rudd, R. Campbell and  
577 L. F. Skerratt (2007). "Electrolyte depletion and osmotic imbalance in amphibians  
578 with chytridiomycosis." Diseases of Aquatic Organisms **77**(2): 113-118.
- 579 54. Walker, S., J. Bosch, T. Y. James, A. Litvintseva, J. A. O. Valls, S. Pina, G. Garcia, G.  
580 Abadie-Rosa, A. A. Cunningham, S. Hole, R. Griffiths and M. C. Fisher (2008).  
581 "Invasive pathogens threaten species recovery programs." Current Biology **18**: R853-  
582 R854.
- 583 55. Webb, R., L. Berger, D. Mendez and R. Speare (2005). "MS-222 (tricaine methane  
584 sulfonate) does not kill the amphibian chytrid fungus *Batrachochytrium*  
585 *dendrobatidis*." Diseases of Aquatic Organisms **68**(1): 89-90.  
586  
587

588 **TABLE 1.** Non-lethal isolation of chytrids from adult and juvenile amphibians  
589

| Continent     | Country       | <i>n</i> Species <sup>1</sup> | <i>n</i> Sampled <sup>2</sup> | <i>n</i> Chytrid <sup>3</sup> | Chytrid species                                    |
|---------------|---------------|-------------------------------|-------------------------------|-------------------------------|----------------------------------------------------|
| Africa        | Madagascar    | 2                             | 145                           | 2                             | <i>Kappamyces</i> sp.                              |
|               | Cameroon      | 1                             | 30                            | 1                             | <i>B. dendrobatidis</i>                            |
|               | Ethiopia      | 1                             | 5                             | 1                             | <i>B. dendrobatidis</i>                            |
|               | South Africa  | 6                             | 179                           | 45                            | <i>B. dendrobatidis</i>                            |
| Asia          | South Korea   | 2                             | 28                            | 10                            | <i>B. dendrobatidis</i>                            |
|               | Taiwan        | 3                             | 103                           | 13                            | <i>B. dendrobatidis</i> /<br><i>Kappamyces</i> sp. |
| Australia     | Australia     | 1                             | 2                             | 2                             | <i>B. dendrobatidis</i>                            |
| Europe        | Belgium       | 1                             | 11                            | 2                             | <i>B. dendrobatidis</i>                            |
|               | France        | 2                             | 261                           | 70                            | <i>B. dendrobatidis</i>                            |
|               | Hungary       | 1                             | 15                            | 3                             | <i>B. dendrobatidis</i>                            |
|               | Italy         | 1                             | 14                            | 4                             | <i>B. dendrobatidis</i>                            |
|               | Portugal      | 1                             | 5                             | 1                             | <i>Rhizophydium</i><br>sp.                         |
|               | Spain         | 4                             | 198                           | 37                            | <i>B. dendrobatidis</i>                            |
|               | Sweden        | 1                             | 23                            | 5                             | <i>B. dendrobatidis</i>                            |
|               | Switzerland   | 1                             | 30                            | 1                             | <i>B. dendrobatidis</i>                            |
|               | UK            | 4                             | 50                            | 8                             | <i>B. dendrobatidis</i>                            |
| South America | Chile         | 1                             | 10                            | 1                             | <i>B. dendrobatidis</i>                            |
|               | French Guiana | 2                             | 66                            | 2                             | <i>B. dendrobatidis</i>                            |
| Trade         | n/a           | 4                             | 15                            | 5                             | <i>B. dendrobatidis</i>                            |

590  
591 <sup>1</sup>Number of amphibian species sampled, <sup>2</sup>total numbers of amphibians sampled, <sup>3</sup> number of  
592 chytrids isolated

593  
594

595 **TABLE 2.** Isolation of *Batrachochytrium dendrobatidis* from mouthparts of larval  
596 amphibians  
597

| <b>Continent</b> | <b>Country</b> | <b>Host species</b> | <b>Larvae sampled</b> | <b><i>Bd</i> isolates</b> |
|------------------|----------------|---------------------|-----------------------|---------------------------|
| Africa           | Ethiopia       | 1                   | 36                    | 1                         |
|                  | Uganda         | 1                   | 20                    | 1                         |
|                  | South Africa   | 2                   | 88                    | 11                        |
| Asia             | Taiwan         | 1                   | 15                    | 1                         |
| Australia        | Australia      | 8                   | 54                    | 33                        |
| Europe           | Belgium        | 2                   | 2                     | 2                         |
|                  | Netherlands    | 1                   | 1                     | 1                         |
|                  | France         | 1                   | 138                   | 38                        |
|                  | Germany        | 1                   | 10                    | 4                         |
|                  | Spain          | 3                   | 19                    | 7                         |
|                  | Switzerland    | 1                   | 42                    | 15                        |
| South America    | Chile          | 2                   | 28                    | 4                         |
|                  | Brazil         | 17                  | 353                   | 217                       |

598  
599

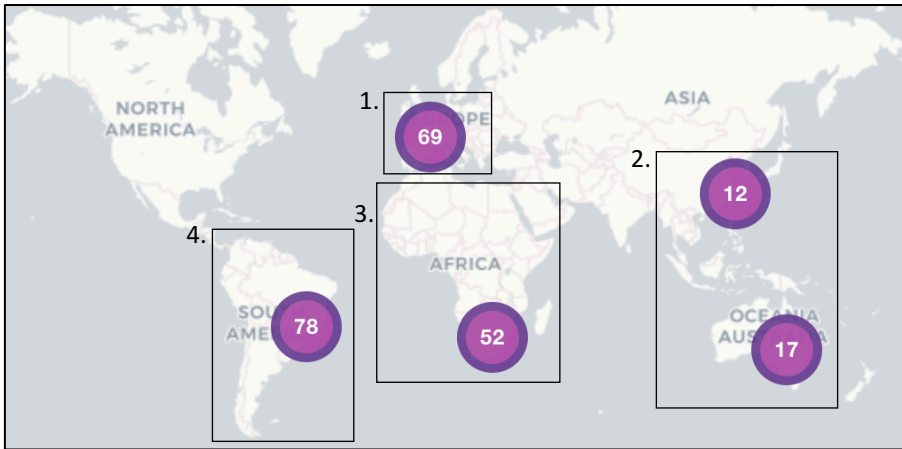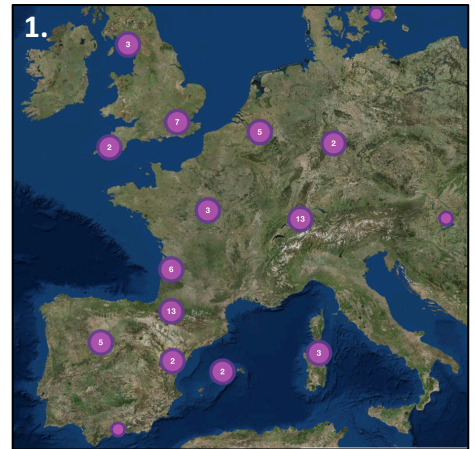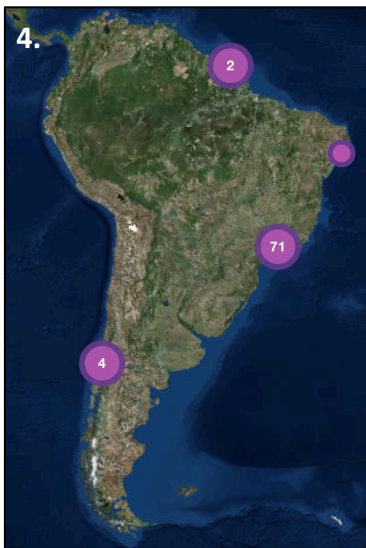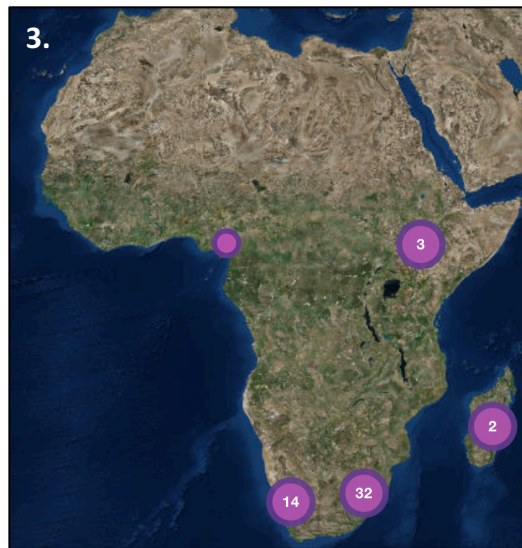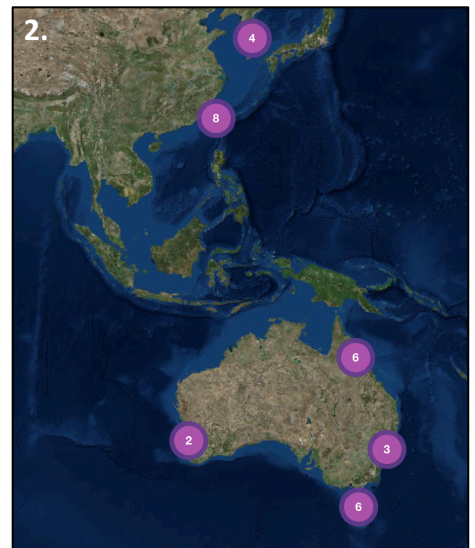

Figure 1. Worldwide distribution of sites where the RML Longcore protocol has been used to isolate chytrids. Numbers denote the quantity of amphibian species investigated. A browseable version of this *Epicollect 5* map can be accessed at <https://five.epicollect.net/project/bd-global-isolation-protocol>
